New York; Late Registrar and First Assistant, Department of Anaesthesia, Central Middlesex Hospital, London. Cloth. \$4.00. Pp. 128, with 2 figures. Charles C Thomas, Publisher, Springfield, Illinois; Blackwell Scientific Publications, Ltd., 24-25 Broad Street, Oxford, England.

Despite its small size, this book contains a great deal of information that should be of interest to the obstetrician as well as to the anesthesiologist. It presents a concise and lucid discussion of the physiological changes in the pregnant woman, and some of the pathological conditions that may be encountered. How these changes influence the analgetic and anesthetic management of her labor and delivery are dealt with clearly. Supported by sufficient references, it brings up-to-date the facts known about placental function and transmission.

The management of the first stage of labor emphasizes a technique that can be used safely in the domiciliary type of practice that is so common in the United Kingdom. The use of conduction analgesia, so popular in the United States, is not presented enthusiastically by this author. Although one may not agree entirely with the author's suggested management of the various obstetrical situations requiring anesthesia, he does present logical reasons for his selection.

There is a very good, though abbreviated, chapter on the physiological changes in the neonate immediately after delivery, and the management of respiratory disturbances that too frequently occur.

This book is well written and has an adequate bibliography. It achieves its objectives in supplying a much needed British text on obstetrical anesthesia, and in pointing out clearly the many deficiencies in our knowledge of the actions of drugs, especially on the child.

DAVID A. DAVIS, M.D.

**A Textbook of Surgical Physiology.** By R. AINSLIE JAMIESON, M.B., F.R.C.S. Ed., Surgeon, Vale of Leven Hospital, Alexandria, Dumbartonshire and ANDREW W. KAY, M.D., CH.M., F.R.C.S. (Ed.) F.R.F.P.S.G. Professor of Surgery, University of Sheffield. Cloth. \$11.00. Pp. 623 with 186 illustrations.

The Williams and Wilkins Co., Baltimore 2, Md., exclusive U. S. agents, 1959.

Anesthesiologists as well as surgeons will find this textbook valuable since it offers, in compact form, information directly related to "those aspects of applied physiology which are fundamental to the practice of general surgery." It is a valuable reference book, encompassing in one volume information which otherwise would require an extensive search of the literature. Discussion of physiology related to clinical surgery and to pathology for the systems and organs of the body are included, except for the central nervous system, ovary, and pituitary. So broad a field necessitates brief treatment, but essential material is well covered.

Excellent paper and clear type make reading this book a pleasant experience. Illustrations include appropriate tables, graphs, drawings, and photographs. References are presented at the end of each chapter and are stated to include only those the authors considered most helpful and authoritative, not all the material which they reviewed.

This book offers a brief, reliable summary of physiology pertinent to surgery. For full discussion of a given subject one would need to consult original articles or more exhaustive texts.

JULIA G. ARROWOOD, M.D.

**Experimental Surgery, Including Surgical Physiology.** By J. MARKOWITZ, M.B.E., M.B. (Tor.), Ph.D., M.S., Prof. of Physiology, University of Toronto; J. ARCHIBALD, D.V.M., M.V. Sc., D.V.M., Prof. and Head of the Division of Small Animal Medicine and Surgery, Ontario Veterinary College, and H. G. DOWNIE, D.V.M., M.S., M.V. Sc., Prof. and Head, Department of Physiological Sciences, Ontario Veterinary College, Guelph, Ont. Fourth Edition. Cloth. Pp. 931 with 580 illustrations. \$12.50. The Williams and Wilkins Company, Baltimore 2, Maryland, 1959.

This is the fourth edition of a popular textbook in experimental surgery which first appeared in 1937, and was previously revised in 1949 and 1954. Although the authors claim
